# Supplementary material for: Digital Image Correlation of Tensile Properties for Monel 400/SS 316L Dissimilar Metal Welding Joints
Source: PubMed Central journal article supplement (PMC8005209; doi:10.3390/ma14061560), 2021-03-22
Supplement: materials-14-01560-s001.pdf [file materials-14-01560-s001.pdf]

Supplementary

# Digital Image Correlation of Tensile Properties for MonelAlloy 400/SS 316L Dissimilar Metal Welding Joints

Cherish Mani <sup>1,\*</sup>, Sozharajan Balasubramani <sup>1</sup>, Ram Karthikeyan <sup>1,\*</sup> and Sathish Kannan <sup>2</sup>

<sup>1</sup> Department of Mechanical Engineering, Birla Institute of Technology & Science, Pilani, Dubai Campus, University, Dubai P.O. Box 345055, United Arab Emirates; Sozharajanram@gmail.com

<sup>2</sup> Department of Mechanical Engineering, American University of Sharjah, Sharjah P.O. Box 26666, United Arab Emirates; skannan@aus.edu

\* Correspondence: cherishmani@gmail.com (C.M.); rkarthikeyan@dubai.bits-pilani.ac.in (R.K.)

Table S1. XRD data for failure region analysis of all specimens at SS 316L HAZ.

| 2 theta (deg) | Height (cts) | FWHM (°2Th.) | d-spacing (Å) | Rel. Int. (%) | Correlated Phase (s)                            | Miller Indices |
|---------------|--------------|--------------|---------------|---------------|-------------------------------------------------|----------------|
| <b>HT</b>     |              |              |               |               |                                                 |                |
| 43.69         | 545.61       | 0.49         | 2.07          | 100           | (Cr Ni), FeNi, FeC                              | A 1 1 1        |
| 51.03         | 45.37        | 0.57         | 1.79          | 8.26          | (Cr Ni), FeNi, Cr <sub>23</sub> C <sub>6</sub>  | A 2 0 0        |
| 74.66         | 10.38        | 0.65         | 1.27          | 1.89          | (Cr Ni), FeNi                                   | A 2 0 2        |
| 90.77         | 32.69        | 0.82         | 1.08          | 5.95          | (Cr Ni), FeNi                                   | A 3 1 1        |
| 96.12         | 21.79        | 0.82         | 1.04          | 3.97          | (Cr Ni)                                         | M 2 2 2        |
| <b>CT</b>     |              |              |               |               |                                                 |                |
| 44.31         | 388.85       | 0.49         | 2.04          | 100           | (Cr Ni), FeNi, Fe <sub>3</sub> C                | A 1 1 1        |
| 51.59         | 40.39        | 0.49         | 1.77          | 65.82         | Cr <sub>23</sub> C <sub>6</sub> , Cr Ni, FeNi   | A 2 0 0        |
| 75.69         | 9.24         | 0.65         | 1.26          | 15.95         | FeNi, Cr Ni                                     | A 2 0 2        |
| 91.93         | 29.1         | 0.65         | 1.07          | 20.68         | Cr <sub>23</sub> C <sub>6</sub> , (Cr Ni), FeNi | A 3 1 1        |
| 97.27         | 19.4         | 0.67         | 1.03          | 4.43          | (Cr Ni)                                         | M 2 2 2        |
| <b>UT</b>     |              |              |               |               |                                                 |                |
| 43.51         | 1000.00      | 0.476        | 2.12          | 100           | (Cr Ni), FeNi                                   | A 1 1 1        |
| 50.7          | 104.3        | 0.714        | 1.83          | 8.45          | Cr <sub>23</sub> C <sub>6</sub> , (Cr Ni), FeNi | A 2 0 0        |
| 74.76         | 40.2         | 0.782        | 1.3           | 1.93          | FeNi, Cr Ni                                     | A 2 0 2        |
| 90.89         | 65.2         | 0.85         | 1.1           | 6.09          | Cr <sub>23</sub> C <sub>6</sub> , Cr Ni, FeNi   | A 3 1 1        |
| 96.14         | 45.7         | 0.986        | 1.06          | 4.06          | (Cr Ni)                                         | M 2 2 2        |
